# Supplementary material
Source: PubMed Central journal article supplement (PMC4376283)
Supplement: NIHMS673022-supplement-Sup_Table_1.pdf [file NIHMS673022-supplement-Sup_Table_1.pdf]

**Supplemental Table 1: Properties of cells used in this study**

|          | Species | Origin                         | Cell Type                    |
|----------|---------|--------------------------------|------------------------------|
| GM02504  | Human   | Fibroblast                     | Primary                      |
| 1089sk   | Human   | Fibroblast (Skin)              | Primary                      |
| Bud8     | Human   | Fibroblast (Skin)              | Primary                      |
| HUVEC    | Human   | Endothelial                    | Primary                      |
| HOS      | Human   | Fibroblast (Bone)              | Osteosarcoma                 |
| Hs913T   | Human   | Fibroblasts (Lung)             | Fibrosarcoma                 |
| Hek293   | Human   | Epithelial (Kidney)            | Adenocarcinoma               |
| 786-0    | Human   | Epithelial (Kidney)            | Adenocarcinoma               |
| MDA231   | Human   | Epithelial (Mammary Gland)     | Adenocarcinoma               |
| A549     | Human   | Epithelial (Lung)              | Carcinoma                    |
| T47D     | Human   | Epithelial (Mammary Gland)     | Ductal Carcinoma             |
| CAKI     | Human   | Epithelial (Kidney)            | Clear Cell Carcinoma         |
| Du145    | Human   | Epithelial (Prostrate)         | Carcinoma                    |
| Hct116   | Human   | Epithelial (Colon)             | Carcinoma                    |
| PANC1    | Human   | Epithelial (Pancreatic)        | Carcinoma                    |
| HeLa     | Human   | Epithelial (Cervical)          | Adenocarcinoma               |
| CCRF-CEM | Human   | Lymphoblast (Peripheral Blood) | Acute Lymphoblastic Leukemia |
| Namalwa  | Human   | Lymphoblast (B-cell)           | Burkitt's Lymphoma           |
| BJAB     | Human   | Lymphoblast (B-cell)           | Lymphoma                     |
| KG1      | Human   | Myeloblast (Bone Marrow)       | Acute Myelogenous Leukemia   |
| VERO     | Monkey  | Epithelial (Kidney)            | Transformed                  |
| BGMK     | Monkey  | Epithelial                     | Transformed                  |
| BHK      | Hamster | Fibroblast                     | Transformed                  |
