# Supplementary material
Source: PubMed Central journal article supplement (PMC4376283)
Supplement: NIHMS673022-supplement-Sup_Table_2.pdf [file NIHMS673022-supplement-Sup_Table_2.pdf]

## Supplemental Table 1: Primers for rtPCR

| Gene   | Primers |                               |
|--------|---------|-------------------------------|
|        | For/Rev | Sequence (5'-3')              |
| IL-8   | For     | GAATGGGTTTGCTAGAATGTGATA      |
|        | Rev     | CAGACTAGGGTTGCCAGATTTAAC      |
| BIRC3  | For     | GGGAAGAGGAGAGAGAAAGAGCAA      |
|        | Rev     | GAATTACACAAGTCAAATGTTGAAAAAGT |
| CXCL5  | For     | CCCACAGTGCTCCAAGGT            |
|        | Rev     | TCAAGACAAATTTCCTTCCCGTTCT     |
| CCL2   | For     | GAAGAATCACCAAGCAGCAAGTGT      |
|        | Rev     | TGGAATCCTGAACCCACTTCTG        |
| IFIT1  | For     | ACACCTGAAAGGCCAGAATG          |
|        | Rev     | GGTTTTCAGGGTCCACTTCA          |
| IFIT2  | For     | GCGTGAAGAAGGTGAAGAGG          |
|        | Rev     | GCAGGTAGGCATTGTTTGGT          |
| OAS1   | For     | AGCTGGCAC AAGAGGCTG A         |
|        | Rev     | CCCATCCCAATTCTTAAAGCAT        |
| ISG15  | For     | GGCTGGGAGCTGACGGTGAAG         |
|        | Rev     | GCTCCGCCCGCCAGGCTCTGT         |
| ISG54  | For     | TGCCGAACAGCTGAGAATTG          |
|        | Rev     | ATCCAGGGCTGCCTCGTTTT          |
| INDO   | For     | CGCCTTGACGCTCTAGTTCTG         |
|        | Rev     | CGGACATCTCCA TGA CCT TTG      |
| GBP4   | For     | GGCATTAGAGATTCTTGACAAGATTC    |
|        | Rev     | CCTGCAAGACGATTCATGAGATAG      |
| CXCL10 | For     | AGGAACCTCCAGTCTCAGCA          |
|        | Rev     | ATTTTGCTCCCCTCTGGTTT          |
| VCAM   | For     | CATGGAATTCGAACCCAAACA         |
|        | Rev     | GGCTGACCAAGACGGTTGTA          |
| CCL5   | For     | ACCAGTGGCAAGTGCTCCA           |
|        | Rev     | GCACACACTTGGCGGTTCTT          |
| GAPDH  | For     | AGGTTGTCTCTGCGACTTCA          |
|        | Rev     | CCAGGAAATGAGCTTGACAAAGTT      |
